# Supplementary material for: Dual PD-L1 and TGF-b blockade in patients with recurrent respiratory papillomatosis
Source: HighWire-hosted journal article supplement (doi:10.1136/jitc-2021-003113), 2021-08-01
Supplement: jitc-2021-003113supp003_data_supplement.pdf [file jitc-2021-003113supp003_data_supplement.pdf]

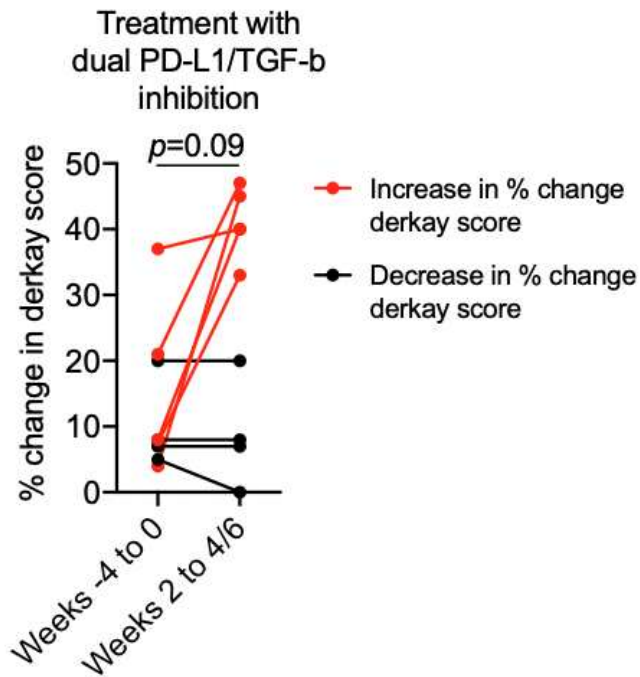

**Supplementary Figure S1 – Comparative rates of papilloma growth before and after dual PD-L1/TGF- $\beta$  inhibition.**

The percent change in the Derkay score from the four weeks prior to treatment with dual PD-L1/TGF- $\beta$  inhibition compared to the percentage change in Derkay score from two to four or six weeks after treatment.

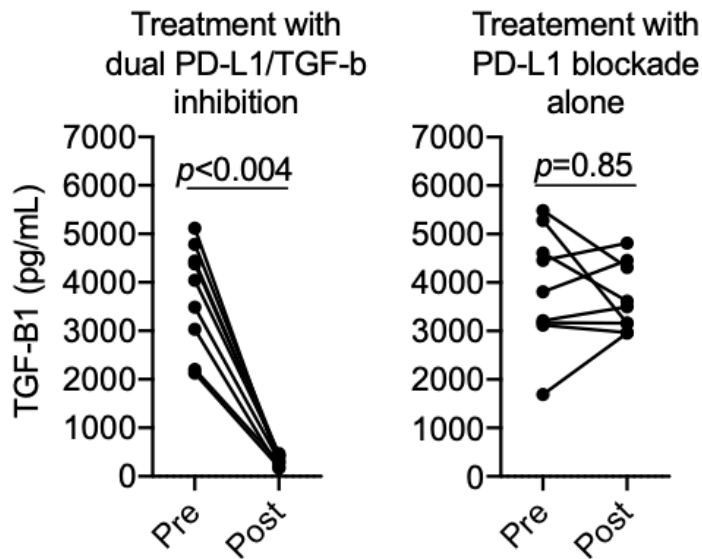

### Supplemental Figure S2 –Systemic TGF- $\beta$ levels

Spider plots of serum TGF- $\beta$  levels following treatment with dual PD-L1/TGF-b inhibition or PD-L1 blockade alone are shown. Pre-treatment serum was obtained within one week prior to initiation of treatment and post-treatment serum was obtained within one week following completion of treatment.  $p$ -value determined by Wilcoxon matched-pairs signed rank test.

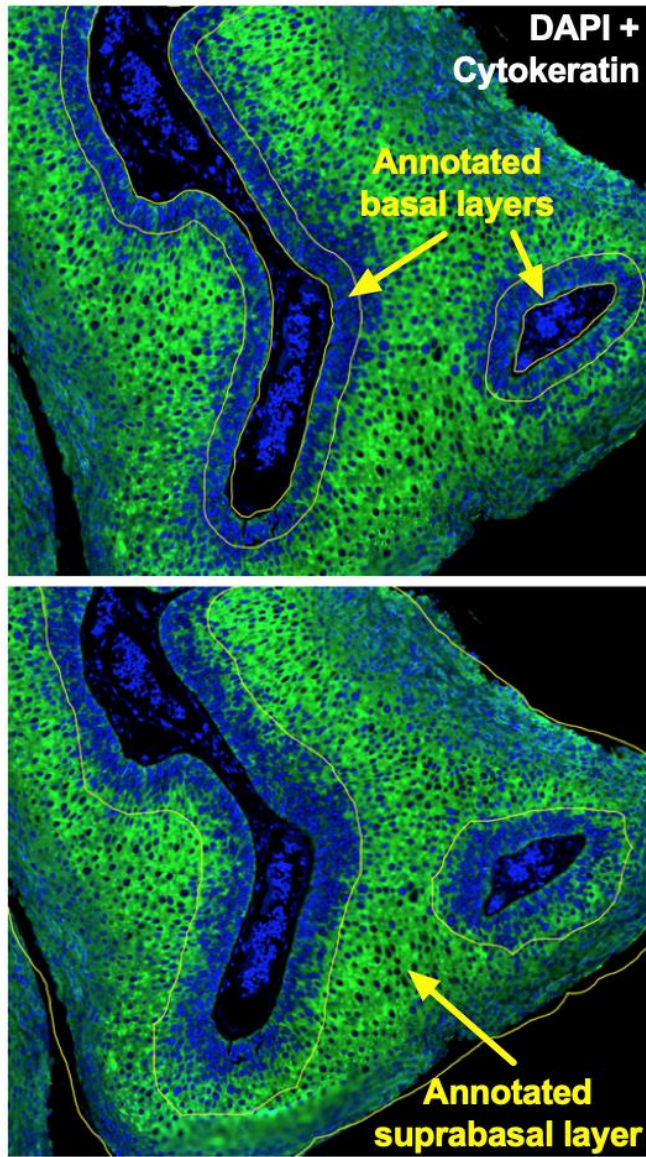

**Supplemental Figure S3 – Representative basal and suprabasal layer annotations.**

Photomicrographs of papillomas stained with a pan-cytokeratin antibody (green) and DAPI (blue) with representative basal (top) and suprabasal (bottom) annotations. The entire section was annotated and scored for each pre- and post-treatment biopsy.

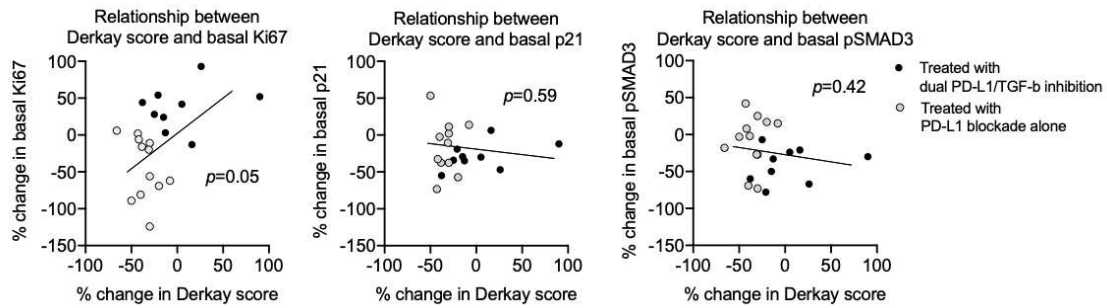

#### Supplemental Figure S4 – Correlation between immunofluorescence and Derkey scores

The correlation between TGF- $\beta$  signaling pathway protein expression or phosphorylation and clinical response in patients treated with dual PD-L1/TGF- $\beta$  inhibition or PD-L1 blockade alone is shown. Significance of correlation was tested by linear regression analysis.

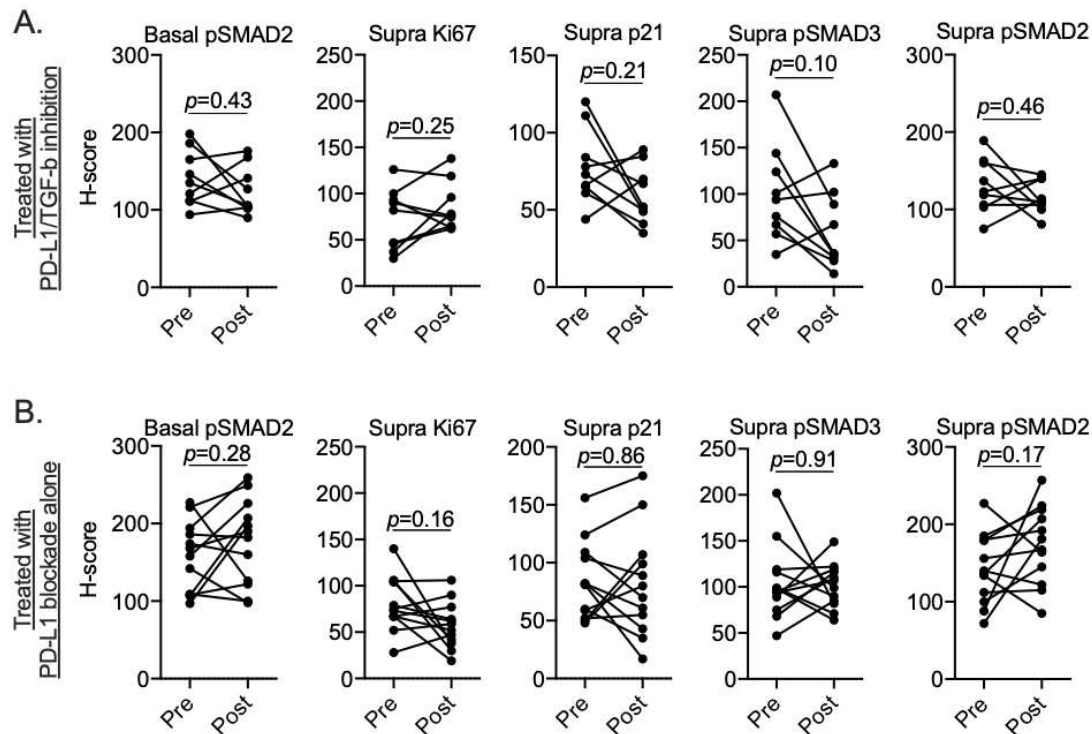

**Supplemental Figure S5 - Assessment of additional TGF- $\beta$  signaling parameters in subjects treated with dual PD-L1/TGF- $\beta$  inhibition or PD-L1 blockade alone.**

Spider plots of changes in quantification of TGF- $\beta$  signaling pathway protein expression or phosphorylation within the basal or suprabasal layers of papillomas in patients treated with (A) dual PD-L1/TGF- $\beta$  inhibition ( $n=9$ ) or (B) PD-L1 blockade alone ( $n=12$ ) are shown. H-scores were determined by quantifying annotated basal cell fluorescence of individual cells across entire biopsy sections.  $p$ -value determined by Wilcoxon matched-pairs signed rank test.

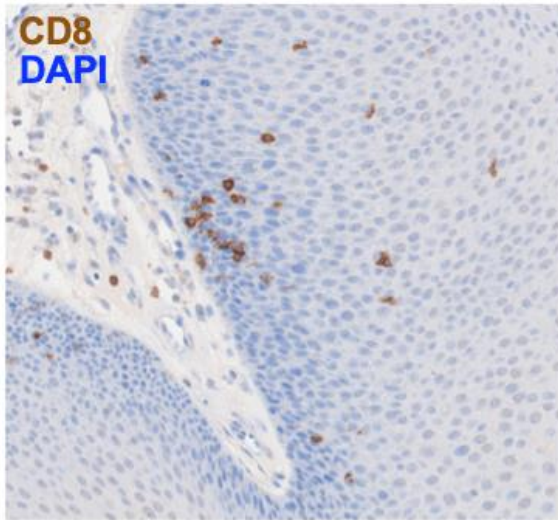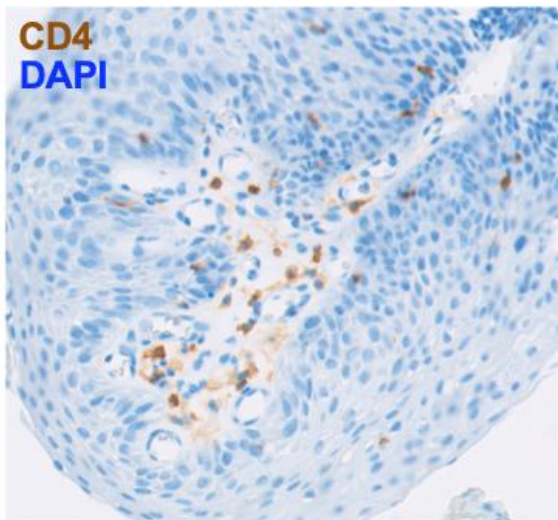

**Supplemental Figure S6 – Representative T-lymphocyte immunohistochemistry.**

Representative photomicrographs of CD8 or CD4 immunohistochemistry.

Supplemental Table I. Demographics of patients treated with bintrafusp alpha

| Patient | Age at treatment (years) | Sex | HPV type | Age at diagnosis (years) | Number of lifetime RRP surgeries | Pulmonary lesions |
|---------|--------------------------|-----|----------|--------------------------|----------------------------------|-------------------|
| 1       | 65                       | M   | 11       | 19                       | >50                              | Yes               |
| 2       | 52                       | F   | 6        | 23                       | >70                              | No                |
| 3       | 42                       | M   | 6        | 37                       | >25                              | No                |
| 4       | 37                       | F   | 6        | 28                       | >90                              | No                |
| 5       | 39                       | M   | 6        | 37                       | 8                                | No                |
| 6       | 25                       | M   | 11       | 1                        | >100                             | Yes               |
| 7       | 20                       | M   | 11       | 1                        | >200                             | Yes               |
| 8       | 18                       | F   | 6        | 5                        | >90                              | No                |
| 9       | 33                       | F   | 6        | 1                        | >250                             | Yes               |

Supplemental Table II. TGF- $\beta$  superfamily genes

| Gene                    | Protein product                             |
|-------------------------|---------------------------------------------|
| <i>TGFB1</i>            | Transforming growth factor beta 1           |
| <i>TGFB2</i>            | Transforming growth factor beta 2           |
| <i>TGFB3</i>            | Transforming growth factor beta 3           |
| <i>TGFBRI (ALK5)</i>    | Transforming growth factor beta receptor 1  |
| <i>TGFBR2</i>           | Transforming growth factor beta receptor 2  |
| <i>TGFBR3</i>           | Transforming growth factor beta receptor 3  |
| <i>BMP2</i>             | Bone morphogenic protein 2                  |
| <i>BMP3</i>             | Bone morphogenic protein 3                  |
| <i>BMP4</i>             | Bone morphogenic protein 4                  |
| <i>BMP5</i>             | Bone morphogenic protein 5                  |
| <i>BMP6</i>             | Bone morphogenic protein 6                  |
| <i>BMP7</i>             | Bone morphogenic protein 7                  |
| <i>BMP9 or GDF2</i>     | Bone morphogenic protein 9                  |
| <i>BMP10</i>            | Bone morphogenic protein 10                 |
| <i>BMP15</i>            | Bone morphogenic protein 15                 |
| <i>BMPRI1A (ALK3)</i>   | Bone morphogenetic protein receptor type 1A |
| <i>BMPRI1B (ALK6)</i>   | Bone morphogenetic protein receptor type 1B |
| <i>BMPRI2</i>           | Bone morphogenetic protein receptor type 2  |
| <i>ACVR1 (ALK2)</i>     | Activin A receptor type 1                   |
| <i>ACVR1B (ALK4)</i>    | Activin A receptor type 1B                  |
| <i>ACVR1C (ALK7)</i>    | Activin A receptor type 1C                  |
| <i>ACVR2A</i>           | Activin A receptor type 2A                  |
| <i>ACVR2B</i>           | Activin A receptor type 2B                  |
| <i>ACVRL1 (ALK1)</i>    | Activin A receptor like type 1              |
| <i>Nodal</i>            | Nodal                                       |
| <i>GDF1</i>             | Growth differentiation factor 1             |
| <i>GDF11</i>            | Growth differentiation factor 11            |
| <i>INHA (Activin A)</i> | Inhibin alpha                               |
| <i>INHBA</i>            | Inhibin subunit beta A                      |
| <i>INHBB</i>            | Inhibin subunit beta B                      |
| <i>INHBC</i>            | Inhibin subunit beta C                      |
| <i>INHBE</i>            | Inhibin subunit beta E                      |
| <i>SMAD2</i>            | Mothers against decapentaplegic homolog 2   |
| <i>SMAD3</i>            | Mothers against decapentaplegic homolog 3   |
| <i>SMAD1</i>            | Mothers against decapentaplegic homolog 1   |
| <i>SMAD5</i>            | Mothers against decapentaplegic homolog 5   |



|                 |                                                               |
|-----------------|---------------------------------------------------------------|
| <i>SMAD4</i>    | Mothers against decapentaplegic homolog 4                     |
| <i>SMAD9</i>    | Mothers against decapentaplegic homolog 9                     |
| <i>SMAD6</i>    | Mothers against decapentaplegic homolog 6                     |
| <i>SMAD7</i>    | Mothers against decapentaplegic homolog 7                     |
| <i>SPTBN1</i>   | Spectrin beta chain, brain 1                                  |
| <i>TGFBRAP1</i> | Transforming growth factor beta receptor associated protein 1 |
| <i>ZFYVE9</i>   | Zinc finger FYVE domain-containing protein 9                  |
